# Supplementary material for: A population pharmacokinetics model of balovaptan to support dose selection in adult and pediatric populations
Source: PubMed Central journal article supplement (PMC11136808; doi:10.1007/s10928-023-09898-0), 2024-02-03
Supplement: 10928_2023_9898_MOESM1_ESM.pdf [file 10928_2023_9898_MOESM1_ESM.pdf]

# **A population pharmacokinetics model of balovaptan to support dose selection in adult and pediatric populations**

*Journal of Pharmacokinetics and Pharmacodynamics*

Franziska Schaedeli Stark<sup>1</sup> · Clarisse Chavanne<sup>1</sup> · Michael Derks<sup>2</sup> · Koen Jolling<sup>3</sup>

Hendrik Maxime Lagraauw<sup>3</sup> · Lars Lindbom<sup>3</sup> · Klaas Prins<sup>3</sup> · Hanna E. Silber Baumann<sup>1</sup>

<sup>1</sup>Roche Pharma Research & Early Development (pRED), Roche Innovation Center Basel, F. Hoffmann-La Roche Ltd, Grenzacherstrasse 124, 4070 Basel, Switzerland

<sup>2</sup>Roche Pharma Research & Early Development (pRED), Roche Innovation Center Welwyn, Roche Products Ltd, Hexagon Place, 6 Falcon Way, Welwyn Garden City, AL7 1TW, UK

<sup>3</sup>qPharmetra LLC, Kwakkenbergweg 39, 6523MK Nijmegen, The Netherlands

## **Corresponding author:**

Franziska Schaedeli Stark, PhD

Email: [franziska.schaedeli\\_stark@roche.com](mailto:franziska.schaedeli_stark@roche.com)

**Supplementary Figure 1** Observed data versus final PopPK model individual and population predictions: (A) linear plot; (B) log plot. Solid line, Loess smooth; dashed line, line of identity

**(A)**

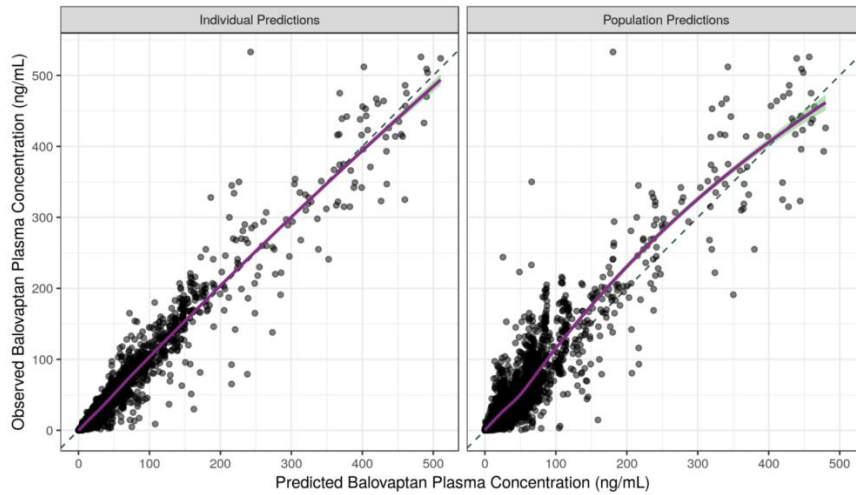

**(B)**

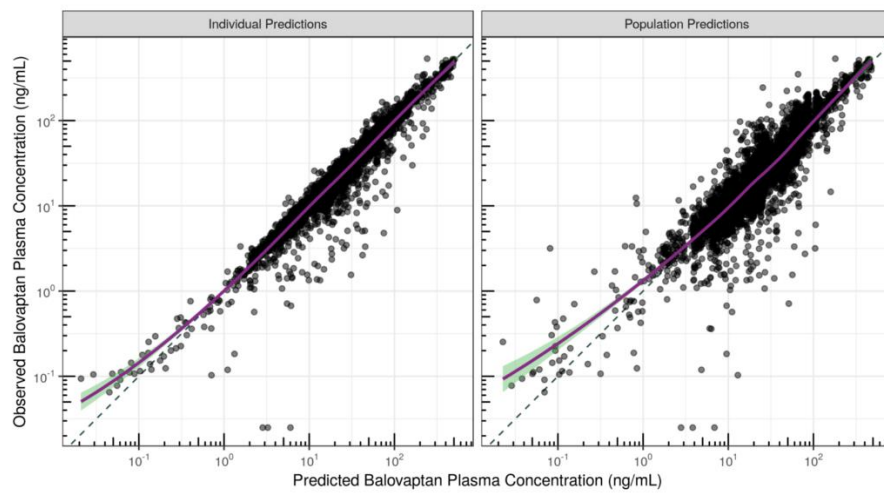

**Supplementary Figure 2** Final PopPK model conditional weighted residual (CWRES) assessments by individual study. (A) CWRES versus time after first dose; (B) CWRES versus time after first dose at steady state; (C) CWRES versus time after last dose; (A–C solid line, Loess smooth; dashed line, zero); (D) Estimated CWRES versus theoretical quantiles of the normal distribution (solid line through 25th and 75th percentiles); (E) Density plot and histogram of CWRES (solid line, density of  $N[0,1]$ )

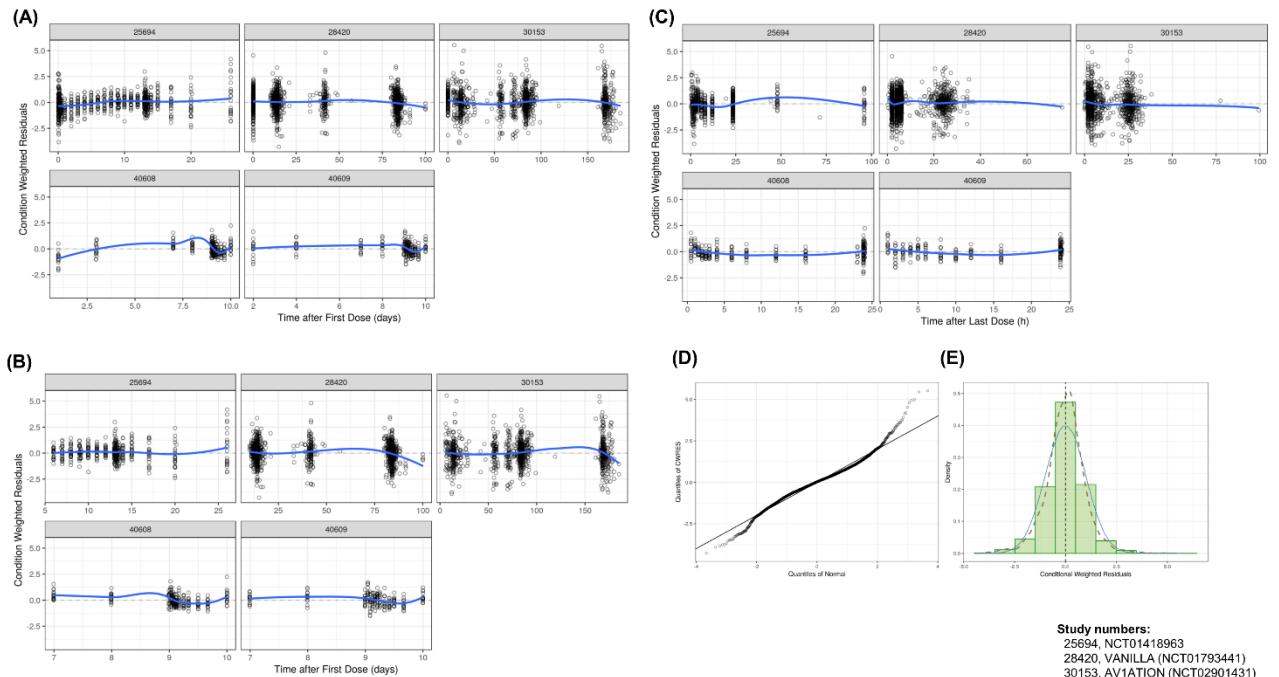

**Study numbers:**  
 25694, NCT01418963  
 28420, VANILLA (NCT01793441)  
 30153, AVIATION (NCT02901431)  
 40608, NCT03586726  
 40609, NCT03579719

## Supplementary material: empirical versus explicit binding models

The explicit binding model (below), which included a saturable rate constant describing the transport of balovaptan to the peripheral binding compartment, significantly improved OFV ( $\Delta\text{OFV} -660$ ), but did not converge and was unstable during estimation:

$$\frac{dA_a}{dt} = -K_a \times A_a$$

$$\frac{dA_c}{dt} = K_a \times A_a - \frac{B_{max} \times K_{pc} \times A_c}{K_m + A_c} + K_{pc} \times A_p - K_e \times A_c$$

$$\frac{dA_p}{dt} = \frac{B_{max} \times K_{pc} \times A_c}{K_m + A_c} - K_{pc} \times A_p$$

Where the elimination rate constant was defined as  $K_e = \frac{CL}{V_c}$ , subscript “a” refers to absorption, “c” to the central compartment, and “p” to the peripheral compartment.

By contrast, an empirical binding model (below) that described distribution volume as a decreasing  $E_{max}$  function based on the amount of balovaptan in the central compartment, resulted in a larger drop in OFV ( $\Delta\text{OFV} -887$ ) and removed the bias between  $V_c/F$  and dose:

$$\frac{dA_a}{dt} = -K_a \times A_a$$

$$\frac{dA_c}{dt} = K_a \times A_a - K_{cp} \times A_c + K_{pc} \times A_p - K_e \times A_c$$

$$\frac{dA_p}{dt} = K_{cp} \times A_c - K_{pc} \times A_p$$

Where the central volume of distribution was defined as:  $V_c = V_0 \times \left(1 - \frac{VL_{max} \times A_c}{A_c + VL_{A50}}\right)$

And the rate constants were defined as:

$$K_e = \frac{CL}{V_c}$$

$$K_{cp} = \frac{Q}{V_c}$$

$$K_{pc} = \frac{Q}{V_p}$$
